# Supplementary material for: Inferring parameters of cancer evolution in chronic lymphocytic leukemia
Source: PubMed Central journal article supplement (PMC9668150; doi:10.1371/journal.pcbi.1010677), 2022-11-04

**a**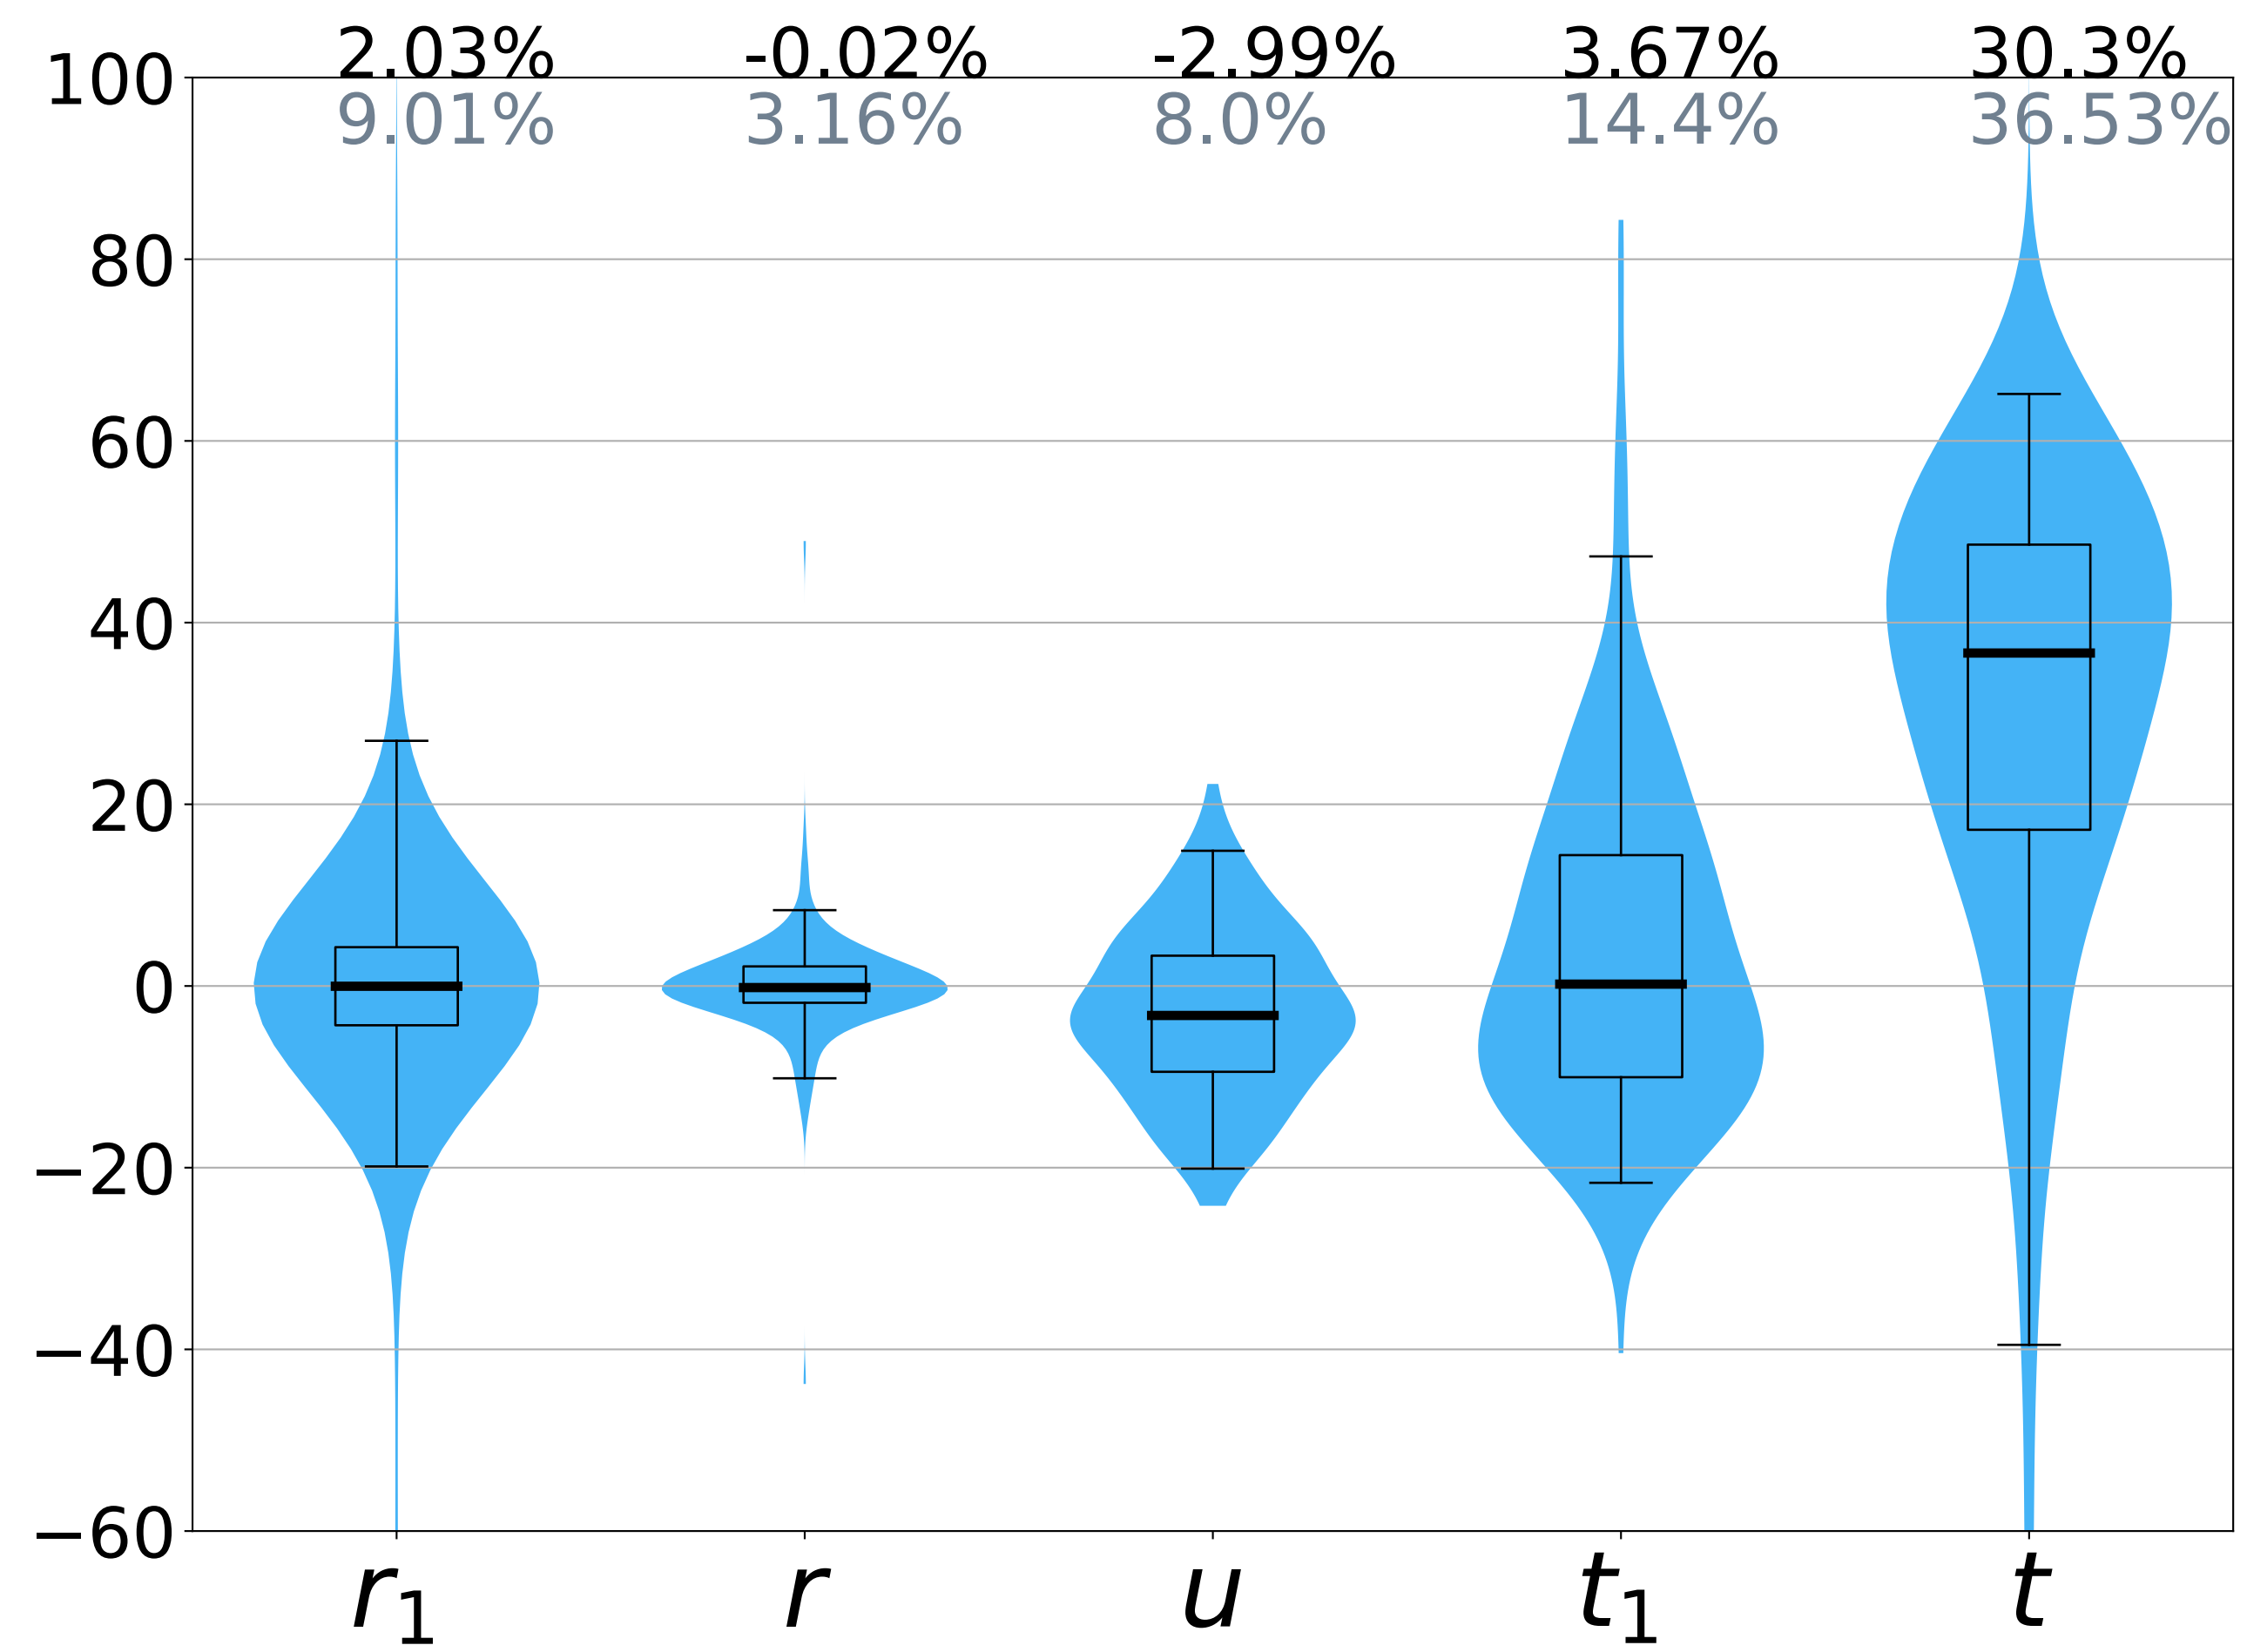**b**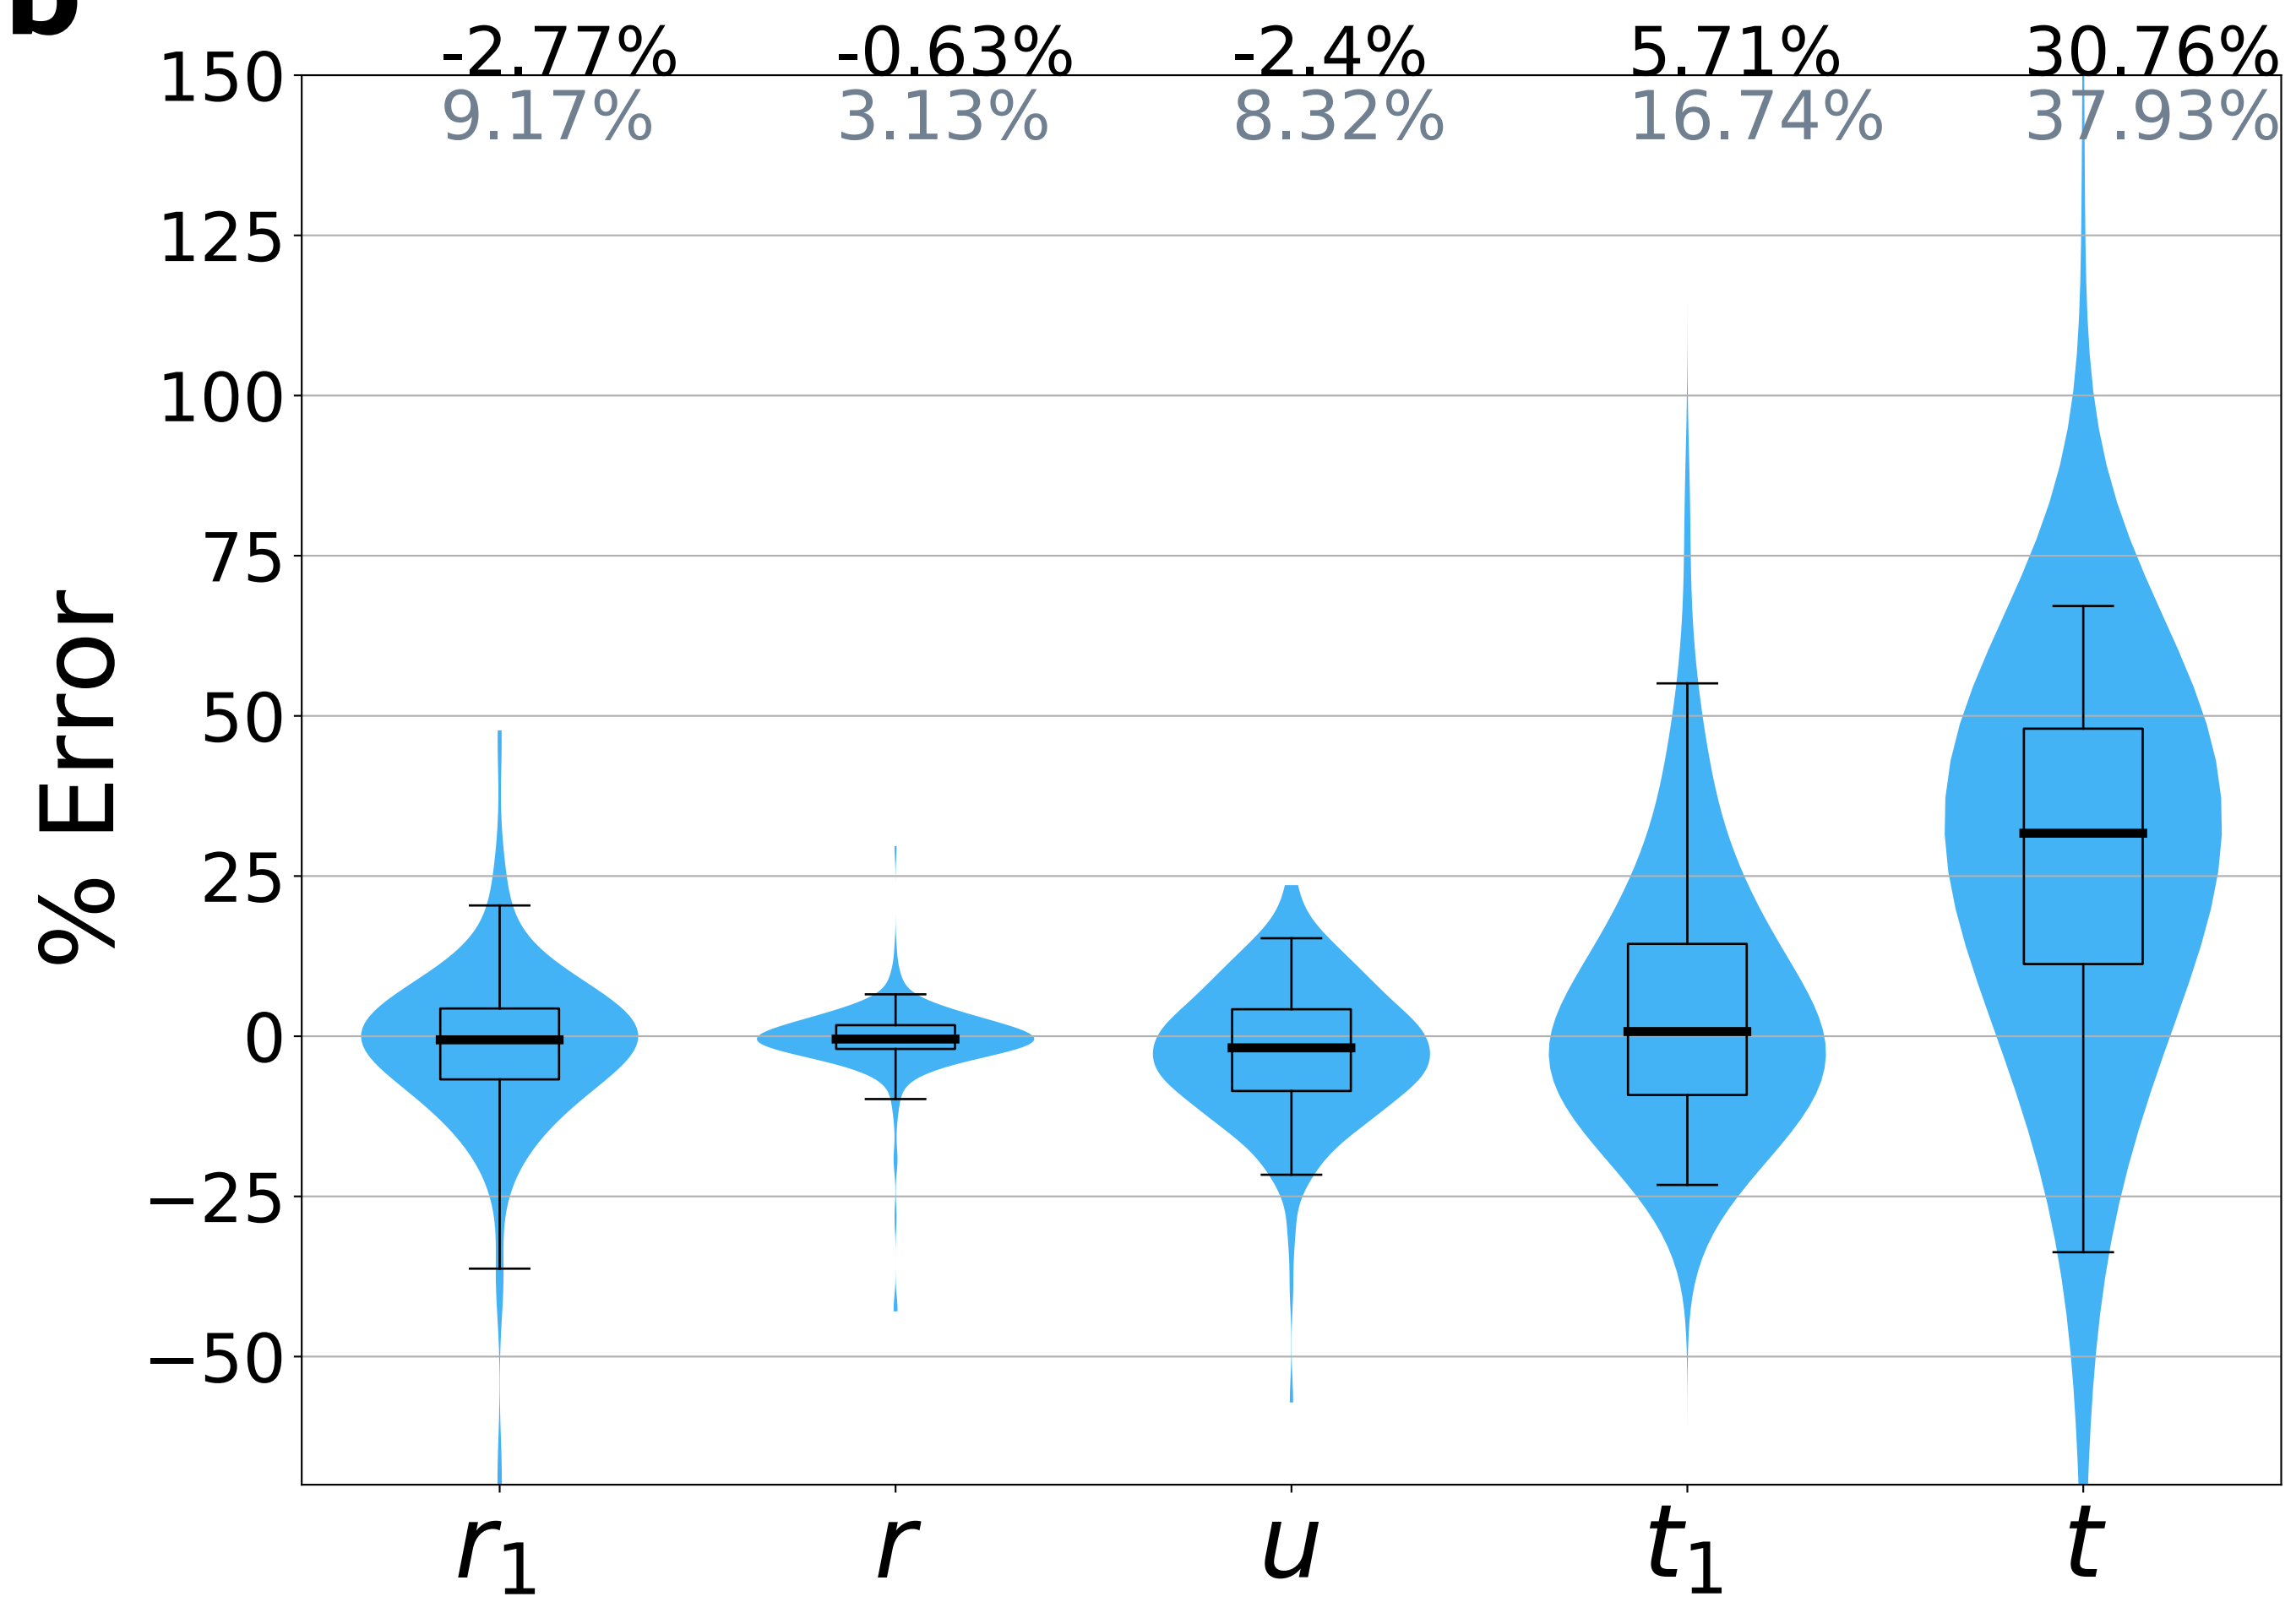**c**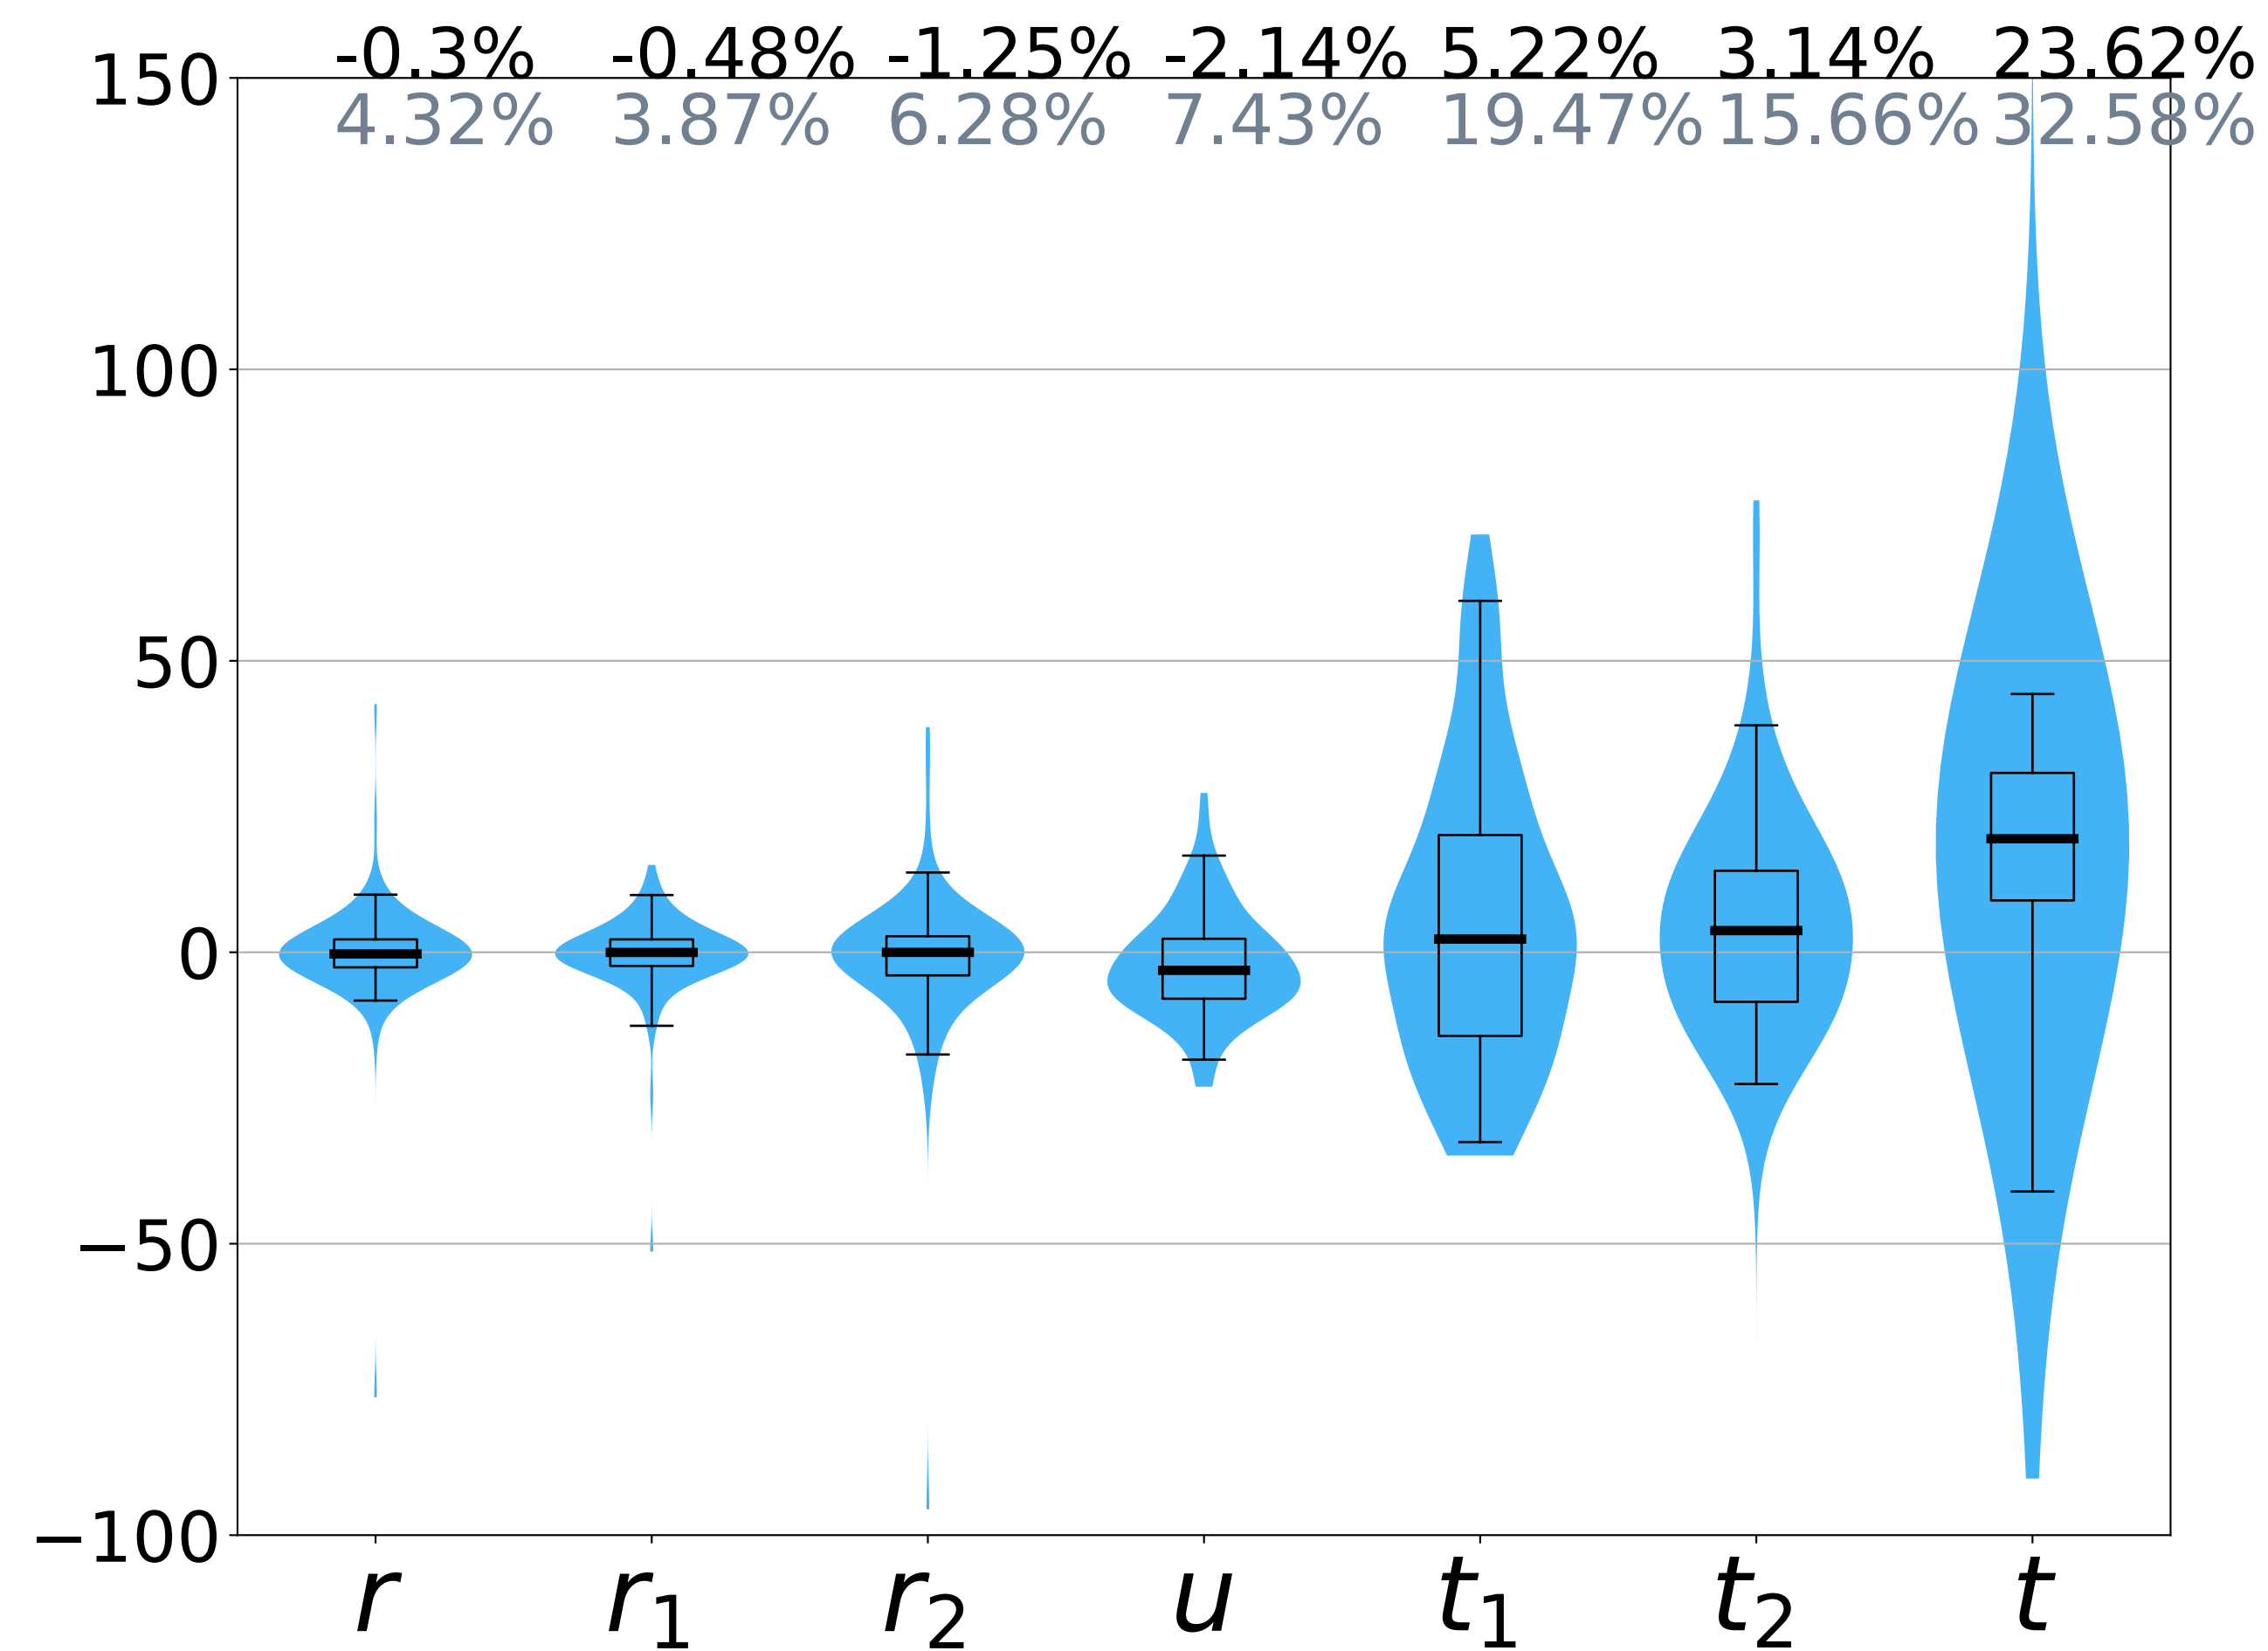**d**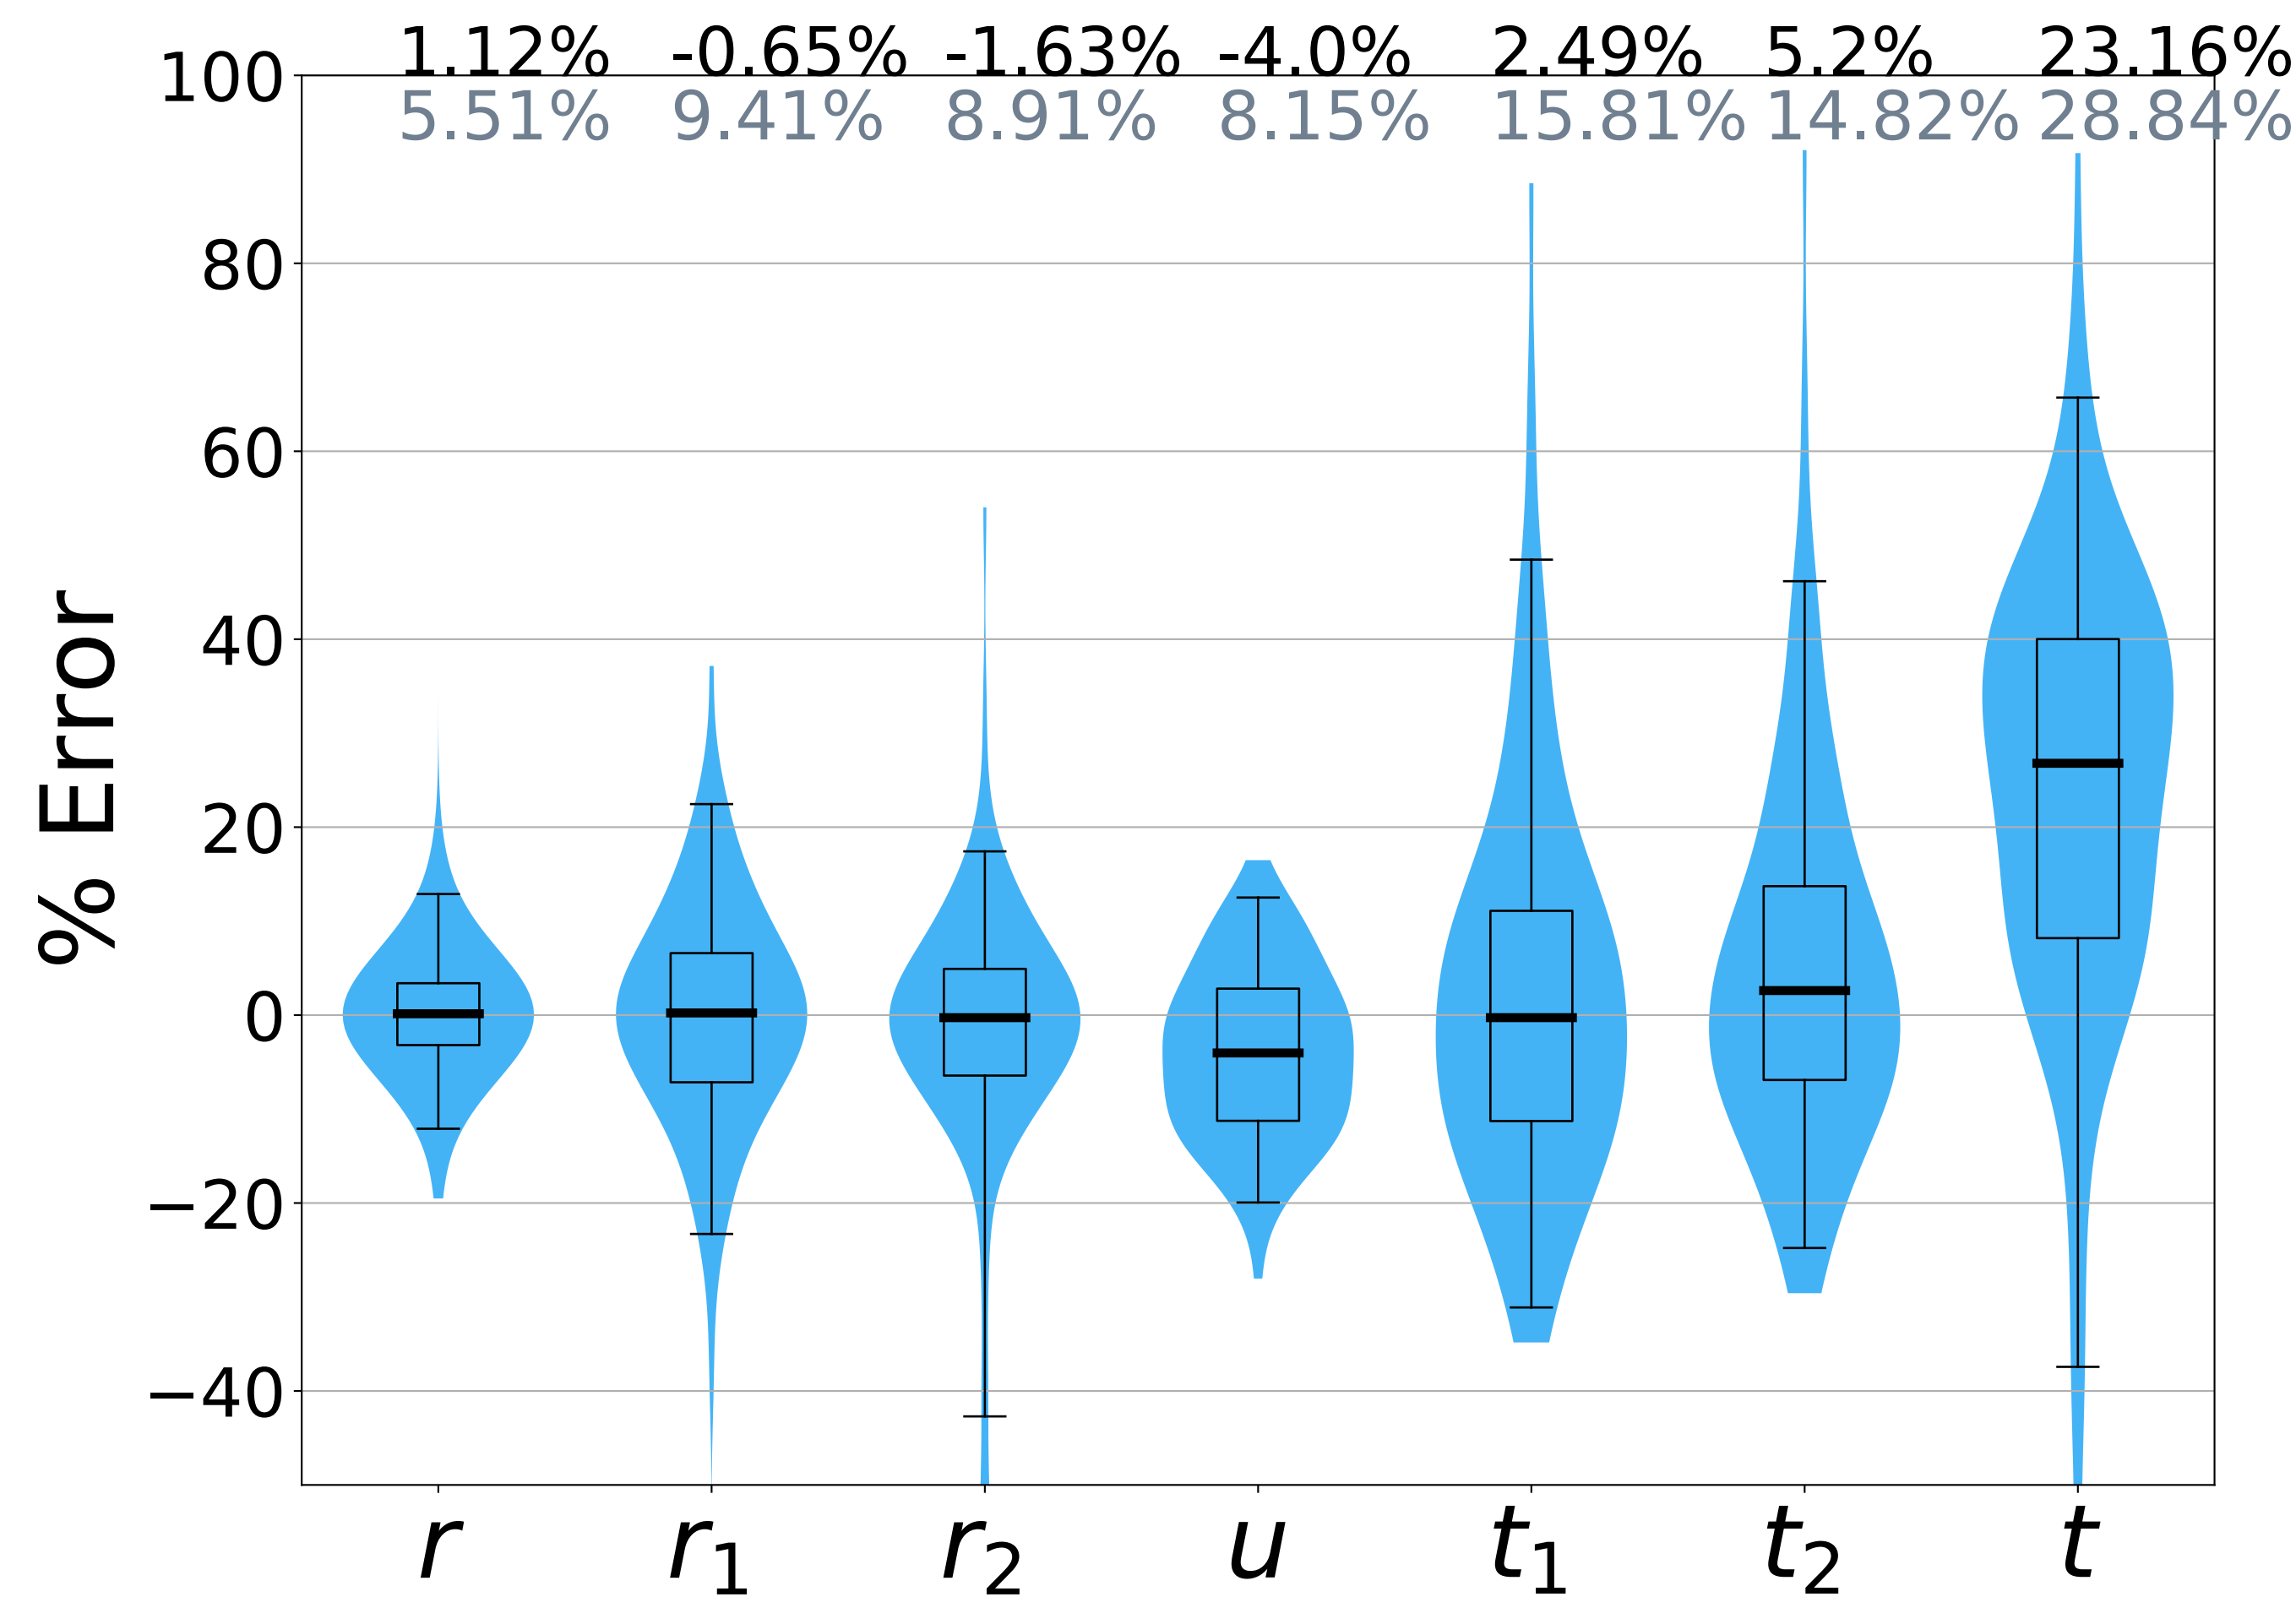

Supplement: pcbi.1010677.s002.pdf [file pcbi.1010677.s002.pdf]
