# Supplementary material for: Inferring parameters of cancer evolution in chronic lymphocytic leukemia
Source: PubMed Central journal article supplement (PMC9668150; doi:10.1371/journal.pcbi.1010677), 2022-11-04
Supplement: pcbi.1010677.s007.pdf [file pcbi.1010677.s007.pdf]

## S1 Methods. Unbiasedness of growth rate.

Denote our estimator for growth rate of the type- $i$  clone  $\hat{r}_i$ , with true parameter value  $r_i$ . The type- $i$  population has size  $X_i(t)$  at time  $t$ . Then,

$$bias(\hat{r}_i) = \mathbb{E}(\hat{r}_i) - r_i \tag{1}$$

$$= \frac{1}{\Delta} \mathbb{E} \log \left( \frac{X_i(t_{dx} + \Delta)}{X_i(t_{dx})} \right) - r_i \tag{2}$$

$$\approx \frac{1}{\Delta} \left( r_i \Delta + \mathbb{E} \log U - \mathbb{E} \log V \right) - r_i \tag{3}$$

$$= \frac{1}{\Delta} (r_i \Delta + (\gamma + \log r_i) - (\gamma + \log r_i)) - r_i \tag{4}$$

$$= 0 \tag{5}$$

where  $U$  and  $V$  are i.i.d.  $\text{Exp}(r_i/b_i)$ , and  $t_{dx}$  is the time of diagnosis.
